# Supplementary material
Source: PubMed Central journal article supplement (PMC9625085)
Supplement: NIHMS1836649-supplement-Supplemental_Materials.pdf [file NIHMS1836649-supplement-Supplemental_Materials.pdf]

## SUPPLEMENTAL MATERIALS

### Chronic e-cigarette use impairs endothelial function on the physiological and cellular levels

Leila Mohammadi MD, PhD,<sup>1</sup> Daniel D. Han BA,<sup>1\*</sup> Fengyun Xu PhD,<sup>2</sup> Abel Huang BA,<sup>3</sup> Ronak Derakhshandeh MSc,<sup>1</sup> Poonam Rao MD,<sup>1#</sup> Adam Whitlatch BS,<sup>3</sup> Jing Cheng MD, MS, PhD,<sup>4</sup> Rachel J. Keith PhD,<sup>5</sup> APRN, Naomi M. Hamburg MD,<sup>6</sup> Peter Ganz MD,<sup>1</sup> Judith Hellman MD,<sup>2</sup> Suzaynn F. Schick PhD,<sup>3,7</sup> Matthew L. Springer PhD<sup>1,7,8</sup>

<sup>1</sup> Division of Cardiology, University of California, San Francisco, San Francisco, California

<sup>2</sup> Department of Anesthesia and Perioperative Care, University of California, San Francisco, San Francisco, California

<sup>3</sup> Division of Occupational and Environmental Medicine, University of California, San Francisco, San Francisco, California

<sup>4</sup> Division of Oral Epidemiology and Dental Public Health, University of California, San Francisco, San Francisco

<sup>5</sup> Department of Medicine, University of Louisville Medical School, Louisville, Kentucky

<sup>6</sup> Department of Medicine, Boston University School of Medicine, Massachusetts

<sup>7</sup> Center for Tobacco Control Research and Education, University of California, San Francisco, San Francisco, California

<sup>8</sup> Cardiovascular Research Institute, University of California, San Francisco, San Francisco, California

#### **Supplemental methods:**

Inclusion Criteria for all participants: 21-50 years old and healthy based on medical history (normal blood pressure, fasting lipid profile and glucose level)

#### Exclusion Criteria for all participants:

- Physician diagnosis of asthma, heart disease, hypertension, dyslipidemia, thyroid disease, diabetes, renal or liver impairment or glaucoma.
- Unstable psychiatric condition (such as current major depression, history of schizophrenia or bipolar disorder) or current use of more than two psychiatric medications
- Pregnancy or breastfeeding (by history)
- Systolic blood pressure >140 mm Hg
- Diastolic blood pressure >90 mm Hg
- Patient on Viagra, Levitra, or Cialis
- Abnormal lipid profile
- Alcohol, opiate, cocaine, amphetamine or methamphetamine dependence within the past 5 years
- BMI >35 or 18 kg/m<sup>2</sup>
- Current opiate, cocaine, amphetamine or methamphetamine use (by history or urine test)
- On anti-coagulant therapy (warfarin, direct thrombin inhibitors, factor Xa inhibitors)
- Occupational exposure to smoke, dusts, or fumes
- Concurrent participation in another clinical trial

- Unable to communicate in English
- Any cardiac or serious conditions, laboratory abnormalities, or psychiatric illness, that is deemed ineligible at the discretion of the investigator
- Unable to withhold the following drugs or nutrients prior to each study visit:

| <b>Drug or Nutrient</b>                                            | <b>Duration of hold</b> |
|--------------------------------------------------------------------|-------------------------|
| Steroid nasal spray                                                | 2 weeks                 |
| Anti-platelet drugs (aspirin)                                      | 7 days                  |
| Non-steroidal anti-inflammatory meds (e.g. ibuprofen and naproxen) | 5 days                  |
| PDE-5 inhibitors (Viagra, Cialis, Levitra)                         | 5 days                  |
| Oral antihistamines                                                | 5 days                  |
| Antioxidant vitamins or supplements                                | 5 days                  |
| Sympathomimetic decongestants                                      | 3 days                  |
| Caffeinated beverages and foods                                    | 12 hours                |
| Alcohol                                                            | 12 hours                |

Additional Inclusion Criteria for Active Smokers:

Currently smoke >5 cigarettes per day  
 ≥ 1 pack year

Additional Exclusion Criteria for Active Smokers:

Unable to hold marijuana for 1 week prior to each study visit.  
 Exhaled CO <10 ppm at each visit  
 Negative salivary cotinine test using a rapid-read, over the counter test with 30 ng/ml cutoff

Additional Exclusion Criteria for Non-smokers:

More than 1 pack year smoking history  
 Quit smoking < 5 years ago  
 Ever a daily marijuana smoker  
 Smoked anything within the last 3 months

Additional Inclusion Criteria for E-Cigarette Users:

Currently use of e-cigarettes > 5 times a week  
 Has used e-cigarettes for >3 months

Additional Exclusion Criteria for E-Cigarette Users:

Current use of other tobacco products  
 Unable to refrain from marijuana use for 1 week prior to each study visit

### Useful Information

Amount of e-liquid in JUULpod: 700 uL (equates to 200 puffs)

Number of puffs per session of JUUL use: 12 – 15 puffs

Amount of nicotine in JUULpod: 40 mg of nicotine in JUULpod

Amount of PG in JUULpod:

$$700 \text{ ul of e-liquid in JUULpod} \times 0.3 = 210 \text{ ul of PG} \times \frac{1 \text{ mL}}{1000 \text{ uL}} \times \frac{1.04 \text{ g}}{1 \text{ mL}} \times \frac{1000 \text{ mg}}{1 \text{ g}} = 218.40 \text{ mg}$$

Amount of VG in JUULpod:

$$700 \text{ ul of e-liquid in JUULpod} \times 0.6 = 420 \text{ ul of VG} \times \frac{1 \text{ mL}}{1000 \text{ uL}} \times \frac{1.261 \text{ g}}{1 \text{ mL}} \times \frac{1000 \text{ mg}}{1 \text{ g}} = 529.62 \text{ mg}$$

### Nicotine:

$$\frac{15 \text{ puff of JUUL per session}}{200 \text{ puff in one JUULpod}} \times 40 \text{ mg of total nicotine} = 3 \text{ mg of nicotine per session}$$

$$\begin{aligned} 3 \text{ mg of nicotine per session} &\times \frac{1 \text{ g}}{1000 \text{ mg}} \times \frac{1 \text{ mol}}{162.23 \text{ g}} \times \frac{1000 \text{ mmol}}{1 \text{ mol}} \\ &= 0.018 \text{ mmol} \div 5 \text{ L of blood in average human} \\ &= \frac{0.0037 \text{ mmol}}{\text{L}} \text{ of nicotine in circulation} \end{aligned}$$

### Propylene Glycol (PG):

$$\frac{15 \text{ puff of JUUL per session}}{200 \text{ puff in one JUULpod}} \times 218.4 \text{ mg of total PG} = 16.38 \text{ mg of PG per session}$$

$$\begin{aligned} 16.38 \text{ mg of PG per session} &\times \frac{1 \text{ g}}{1000 \text{ mg}} \times \frac{1 \text{ mol}}{76.09 \text{ g}} \times \frac{1000 \text{ mmol}}{1 \text{ mol}} \\ &= 0.215 \text{ mmol} \div 5 \text{ L of blood in average human} = \frac{0.043 \text{ mmol}}{\text{L}} \text{ of PG in circulation} \end{aligned}$$

### Vegetable Glycerin (VG):

$$\frac{15 \text{ puff of JUUL per session}}{200 \text{ puff in one JUULpod}} \times 529.62 \text{ mg of total VG} = 39.72 \text{ mg of VG per session}$$

$$\begin{aligned} 39.72 \text{ mg of VG per session} &\times \frac{1 \text{ g}}{1000 \text{ mg}} \times \frac{1 \text{ mol}}{92.094 \text{ g}} \times \frac{1000 \text{ mmol}}{1 \text{ mol}} \\ &= 0.431 \text{ mmol} \div 5 \text{ L of blood in average human} = \frac{0.086 \text{ mmol}}{\text{L}} \text{ of VG in circulation} \end{aligned}$$

**Supplemental Figures:**

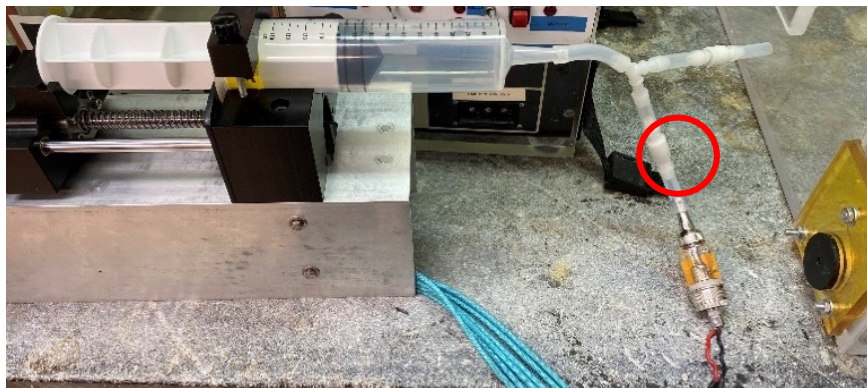

**Figure S1. E-cigarette aerosol generation set-up for the collection of condensates.** Photograph of the Gram system and the aerosol generation set-up. Red circle indicates the one-way valve where the e-cigarette aerosol condensates are collected.

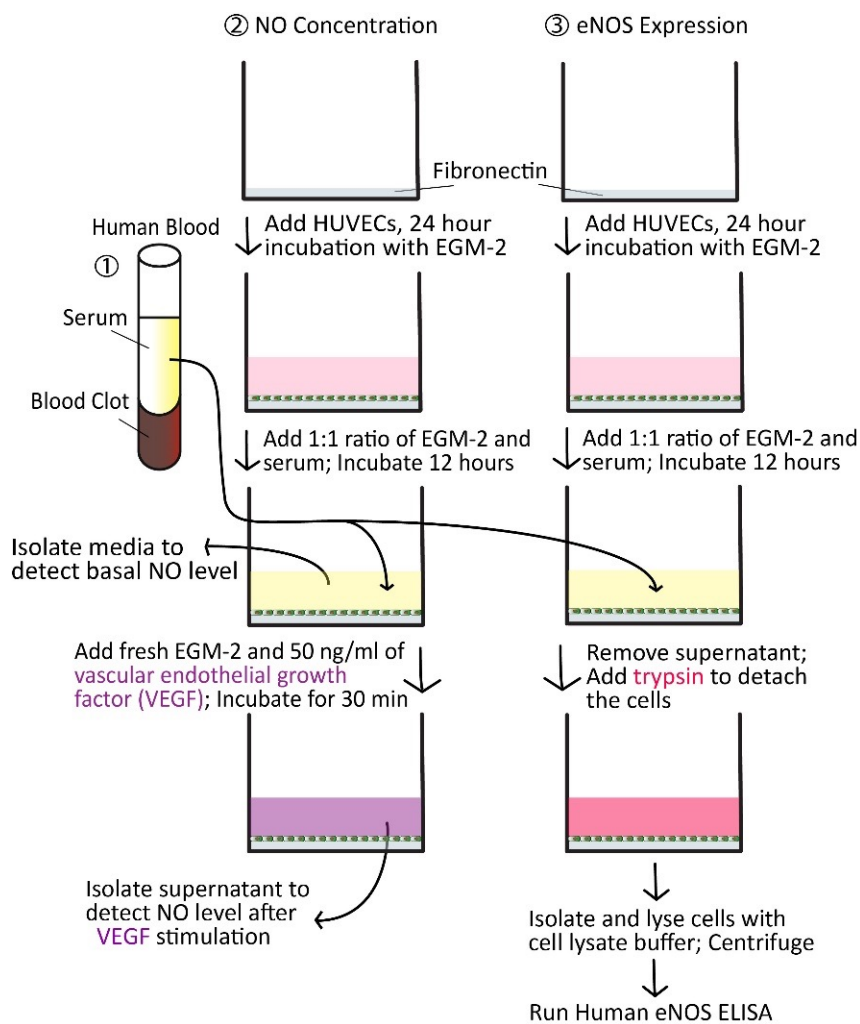

**Figure S2. Sequence of events in the endothelial cell culture protocol for NO studies.** Cells were plated in two parallel workflows as shown graphically in the two columns.

A FMD of brachial artery in nonusers

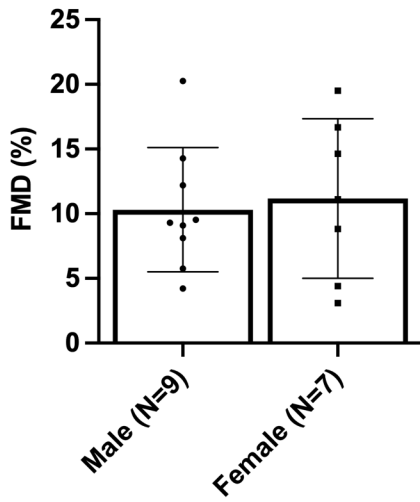

B Brachial artery baseline diameter

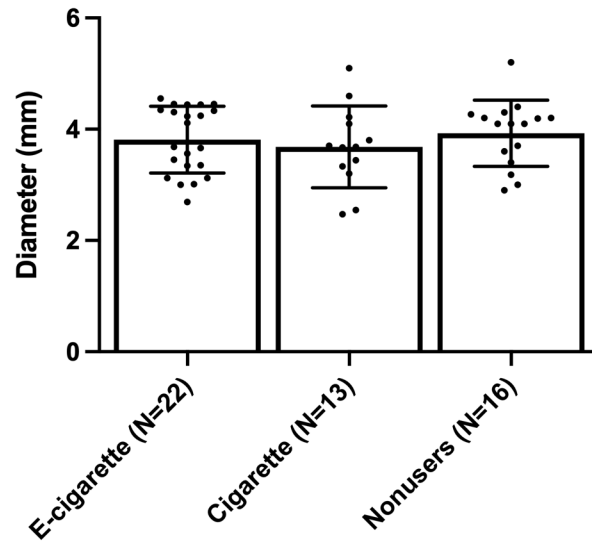

**Figure S3.** No significant change was observed in FMD between male and female nonusers. Also, there was no significant change in baseline diameter of brachial artery in all groups ( $p < .05$  required for significance; all  $p$  values were  $> 0.1$ ). Group means were compared by Mann-Whitney test and Kruskal Wallis. Bars=SD.

|                                                                            |                                                                         |
|----------------------------------------------------------------------------|-------------------------------------------------------------------------|
| Cells treated with e-liquid aerosol condensate (41.25 mM) without nicotine | Cells treated with e-liquid aerosol condensate (41.25 mM) with nicotine |
|----------------------------------------------------------------------------|-------------------------------------------------------------------------|

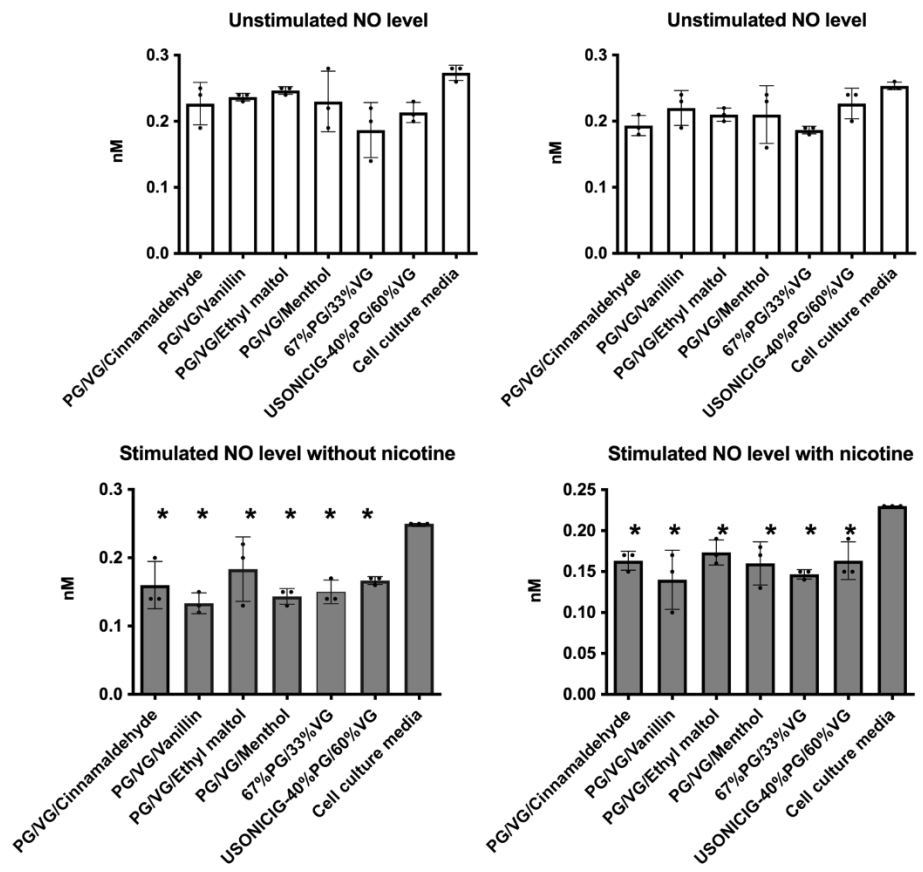

**Figure S4. NO level released from HUVECs treated with 41.25 mM (0.3% v/v) aerosol condensate.** E-liquid aerosol condensates at this concentration decreased VEGF-stimulated NO production compared to culture medium control (\* $P < 0.05$ ). Group means were compared by Kruskal-Wallis with Dunn's post-hoc adjustment. Bars=SD.

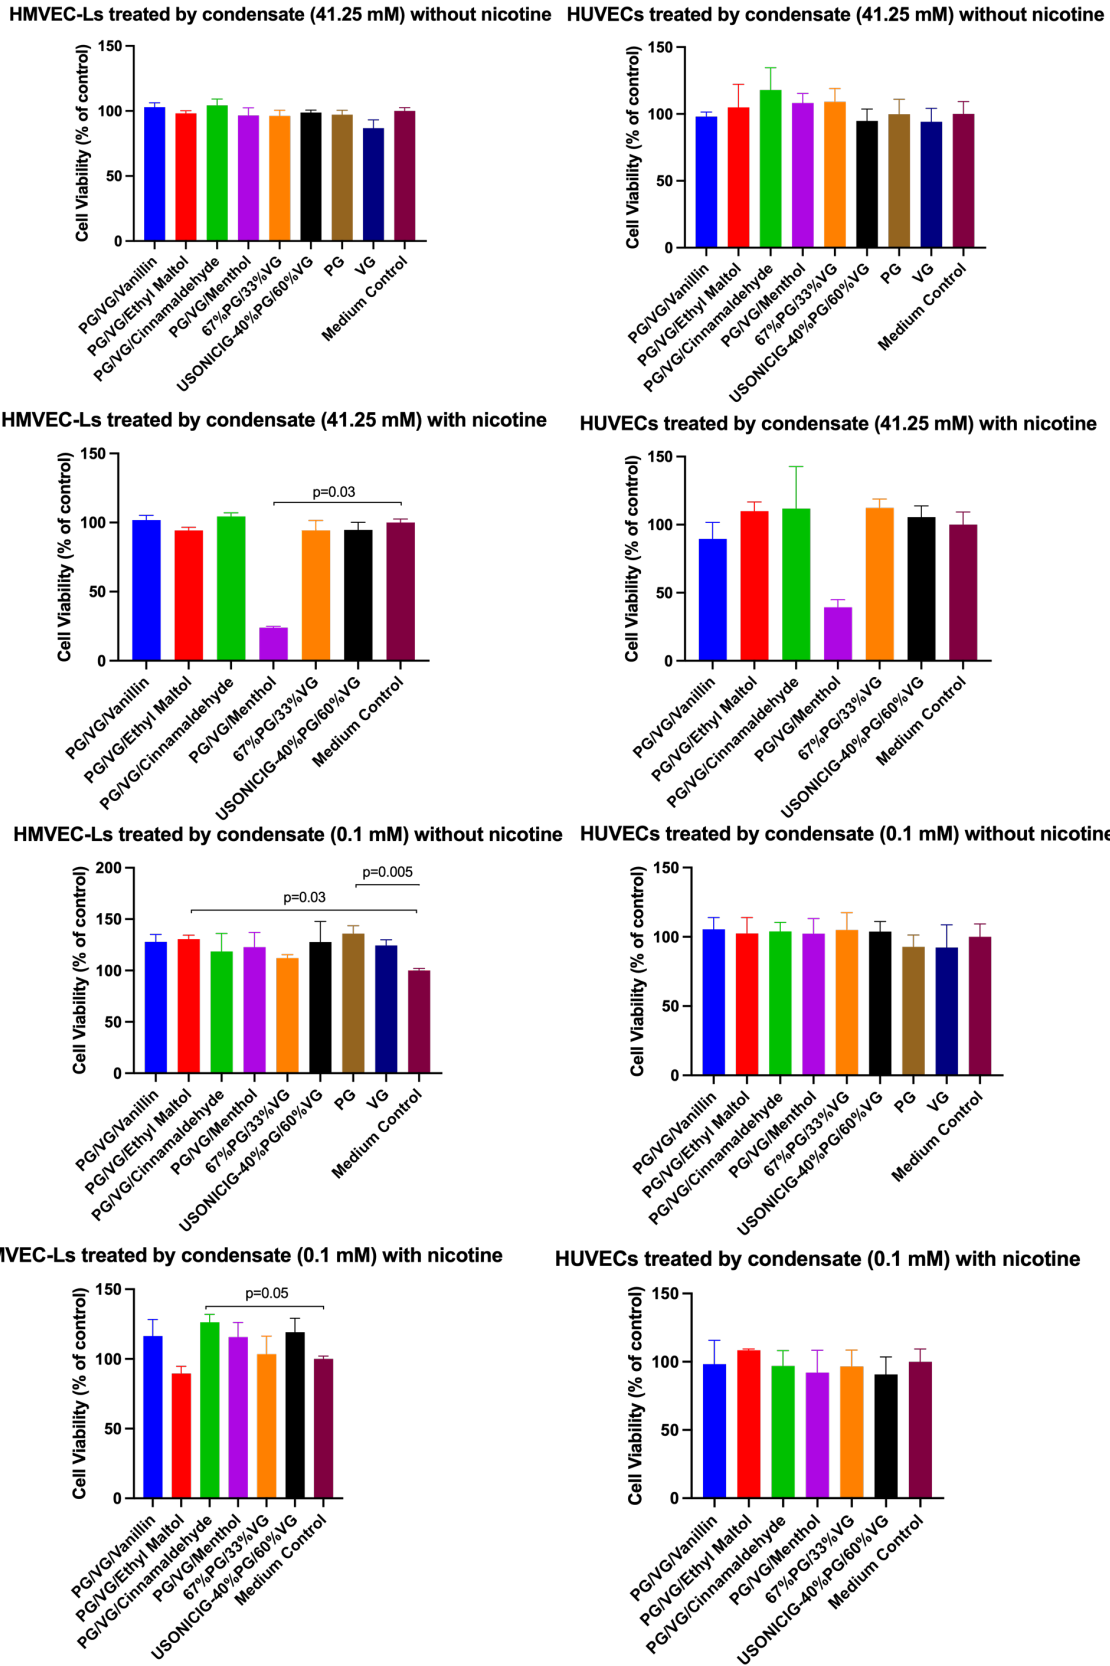

**Figure S5. Viability assessment of endothelial cells for different aerosol condensate conditions using CCK8 kit.** \* is significance ( $p < .05$ ) from Kruskal-Wallis test with Dunn's post-hoc adjustment. Bars=SD.



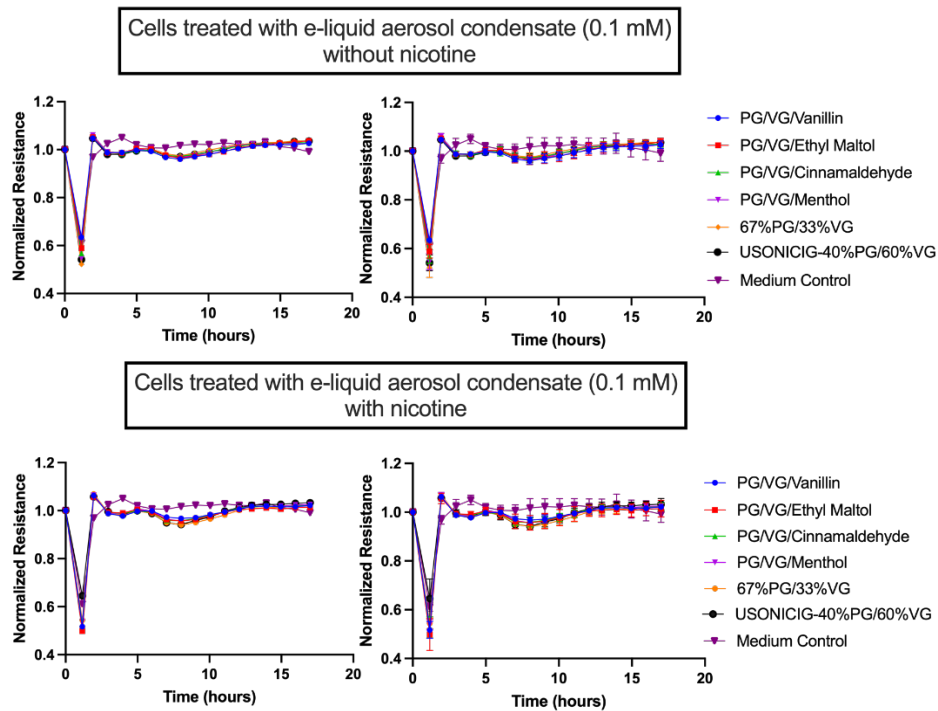

**Figure S6. Endothelial cell permeability was not changed in cells treated with e-liquid aerosol condensate in the medium without human serum (0.1 mM).** Graph shows resistance across a monolayer of HMVEC-Ls; lower resistance values correspond to greater permeability.  $p < .05$  required for significance; all  $p$  values were  $> 0.1$ . Group means at each timepoint were compared by repeated measures ANOVA with post-hoc adjustment. Bars=SD.

Cells treated with e-liquid aerosol condensate without nicotine (41.25 mM)

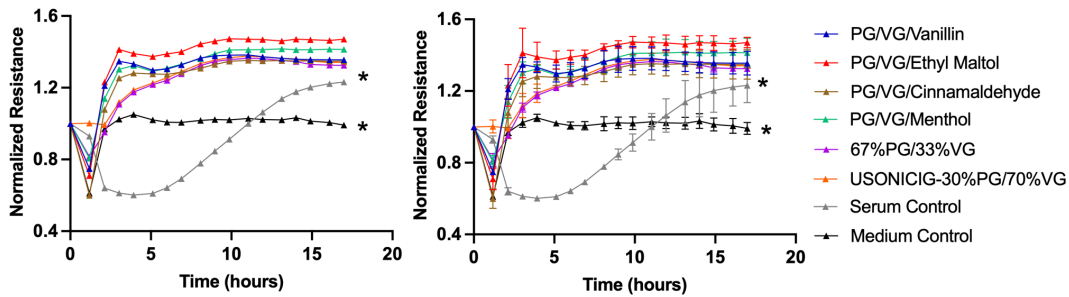

Cells treated with e-liquid aerosol condensate with nicotine (41.25 mM)

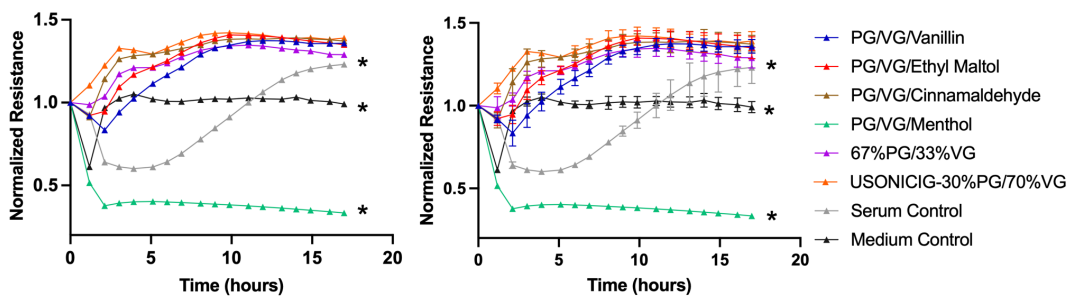

**Figure S7. Endothelial cell permeability was decreased in cells treated with e-liquid aerosol condensate (41.25 mM).** Graph shows resistance across a monolayer of HMVEC-Ls; lower resistance values correspond to greater permeability. (\* $p < 0.05$  for PG/VG/menthol starting at 3 hours, serum control starting at 6 hours and medium control starting at 2 hours compared to all other conditions.) Group means at each timepoint were compared by repeated measures ANOVA with Holm-Šidák post-hoc adjustment. Bars=SD.

## Inflammatory Biomarkers

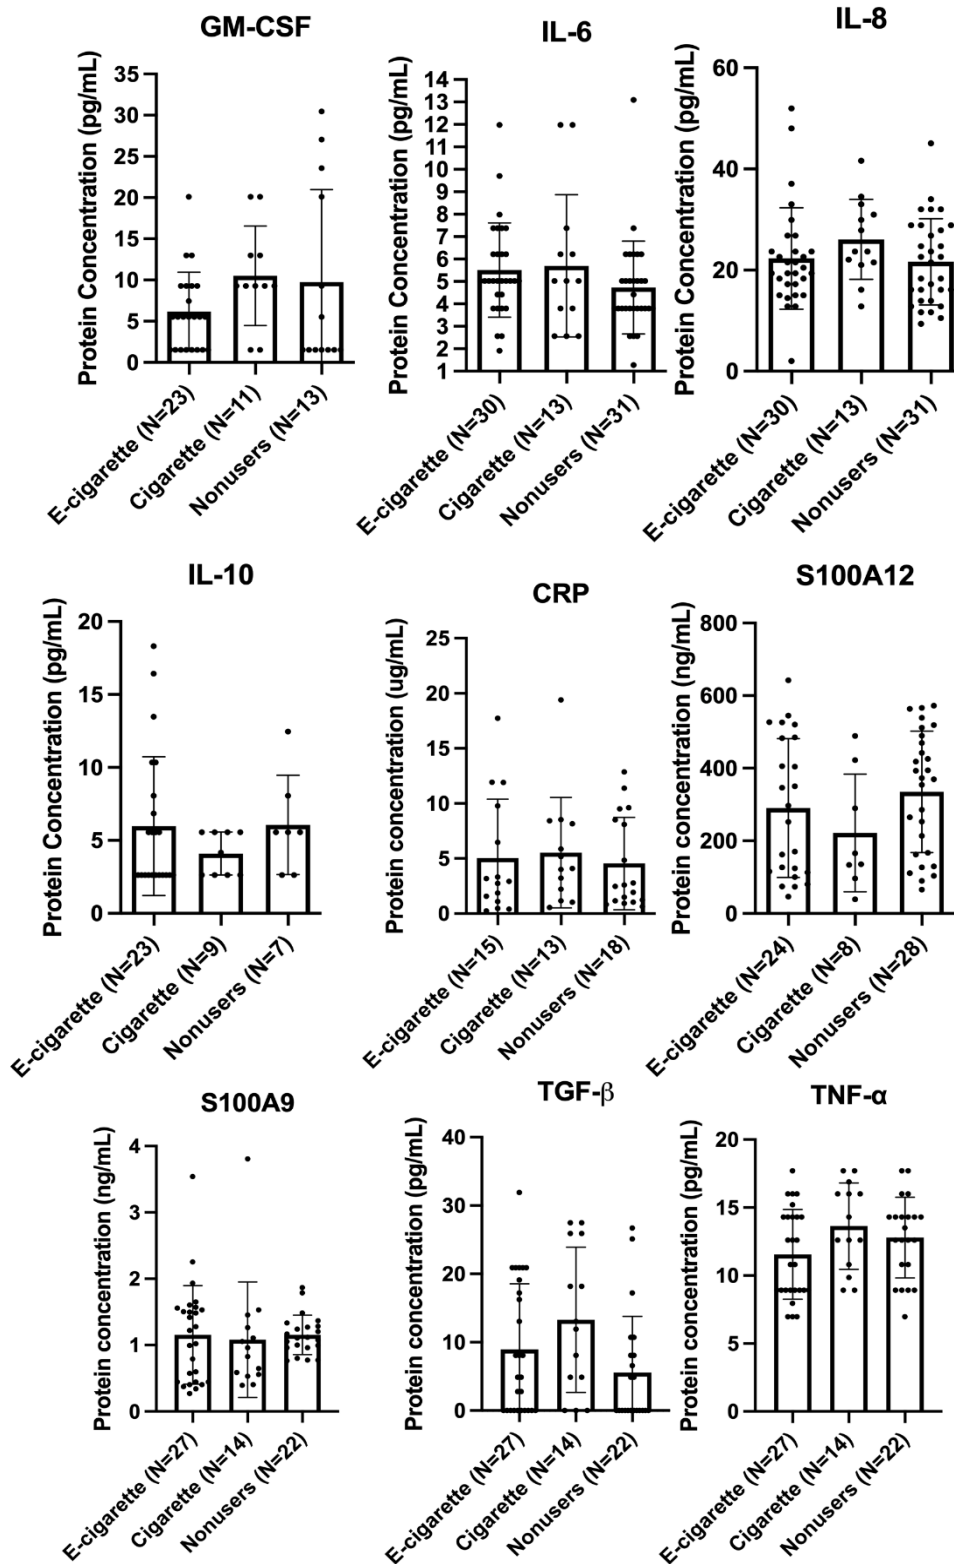

**Figure S8. No significant changes were observed in these inflammatory biomarkers between all groups.**  $p < .05$  required for significance; all  $p$  values were  $> 0.1$ . Group means were compared by Kruskal-Wallis test with Dunn's post-hoc adjustment. Bars=SD.

## Thrombotic Biomarkers

## Cell Adhesion Biomarkers

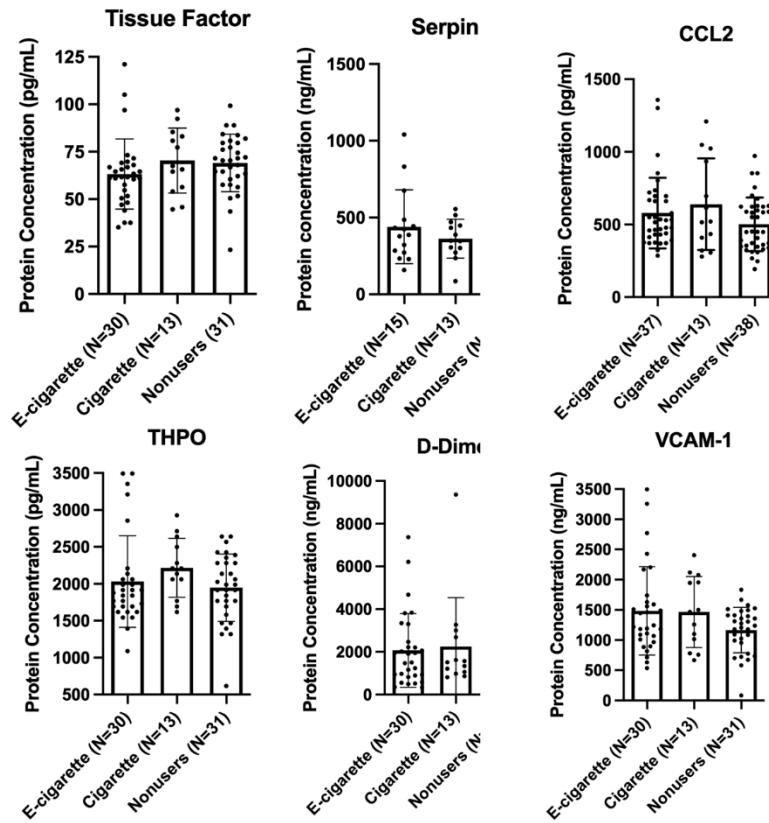

## Angiogenesis Biomarkers

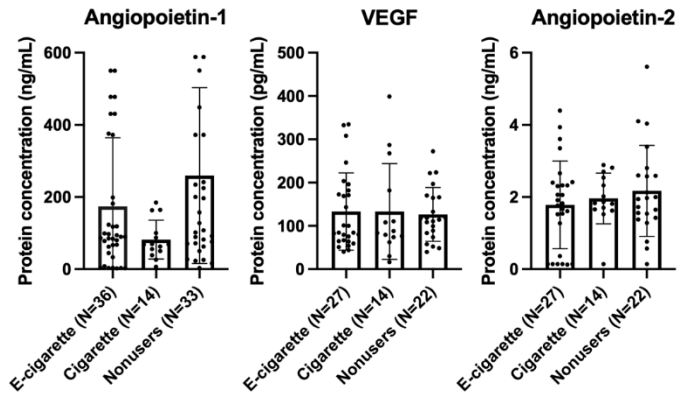

**Figure S9.** No significant changes were observed in the above angiogenic, thrombotic, and cell adhesion biomarkers between all groups.  $p < .05$  required for significance; all  $p$  values were  $\geq 0.1$ . Group means were compared by Kruskal-Wallis test with Dunn's post-hoc adjustment. Bars=SD.

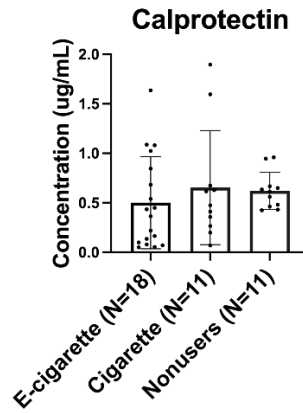

**Figure S10. Serum calprotectin levels.** There were no significant changes in the level of calprotectin in sera from e-cigarette users and cigarette smokers compared to nonusers ( $p < .05$  required for significance; all  $p$  values were  $> 0.1$ ). Group means were compared by Kruskal-Wallis test with Dunn's post-hoc adjustment. Bars=SD.

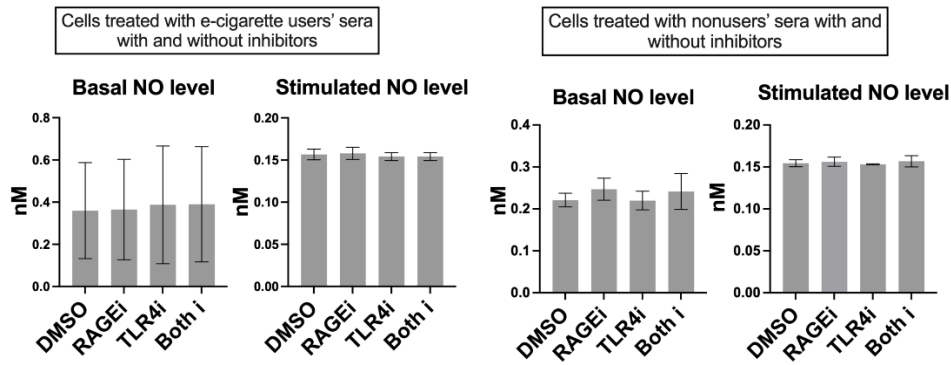

**Figure S11. RAGE and TLR4 inhibition do not affect NO production in e-cigarette users and nonusers.** There were no significant differences between the groups in all graphs ( $p < .05$  required for significance; all  $p$  values were  $> 0.1$ ). Group means were compared by Kruskal-Wallis test with Dunn's post-hoc adjustment. Bars=SD.

## Major Resources Table

In order to allow validation and replication of experiments, all essential research materials listed in the Methods should be included in the Major Resources Table below. Authors are encouraged to use public repositories for protocols, data, code, and other materials and provide persistent identifiers and/or links to repositories when available. Authors may add or delete rows as needed.

### Cultured Cells

| Name    | Vendor or Source               | Sex (F, M, or unknown) | Persistent ID / URL                                                                                                                                                                                                                                                                                                                     |
|---------|--------------------------------|------------------------|-----------------------------------------------------------------------------------------------------------------------------------------------------------------------------------------------------------------------------------------------------------------------------------------------------------------------------------------|
| HUVEC   | Lonza, Basel, Switzerland      | Unknown                | <a href="https://bioscience.lonza.com/lonza_bs/US/en/Primary-and-Stem-Cells/p/000000000000184665/HUVEC---Human-Umbilical-Vein-Endothelial-Cells%2C-Pooled%2C-in-EGM-2">https://bioscience.lonza.com/lonza_bs/US/en/Primary-and-Stem-Cells/p/000000000000184665/HUVEC---Human-Umbilical-Vein-Endothelial-Cells%2C-Pooled%2C-in-EGM-2</a> |
| HMVEC-L | PromoCell, Heidelberg, Germany | Male                   | <a href="https://promocell.com/product/human-pulmonary-microvascular-endothelial-cells-hpmec/">https://promocell.com/product/human-pulmonary-microvascular-endothelial-cells-hpmec/</a>                                                                                                                                                 |

### Other

| Description                                      | Source / Repository | Persistent ID / URL                                                                                                                                                                                                                                                                                 |
|--------------------------------------------------|---------------------|-----------------------------------------------------------------------------------------------------------------------------------------------------------------------------------------------------------------------------------------------------------------------------------------------------|
| Human Fibronectin                                | Sigma-Aldrich       | <a href="https://www.sigmaaldrich.com/US/en/product/sigma/ecm001">https://www.sigmaaldrich.com/US/en/product/sigma/ecm001</a>                                                                                                                                                                       |
| EGM-2 Endothelial Cell Growth Medium-2 BulletKit | Lonza               | <a href="https://bioscience.lonza.com/lonza_bs/US/en/Primary-and-Stem-Cells/p/000000000000185303/EGM™-2-Endothelial-Cell-Growth-Medium-2-BulletKit™">https://bioscience.lonza.com/lonza_bs/US/en/Primary-and-Stem-Cells/p/000000000000185303/EGM™-2-Endothelial-Cell-Growth-Medium-2-BulletKit™</a> |
| Human Recombinant VEGF                           | Sigma-Aldrich       | <a href="https://www.sigmaaldrich.com/US/en/product/mm/gf315">https://www.sigmaaldrich.com/US/en/product/mm/gf315</a>                                                                                                                                                                               |
| Recombinant Human VEGF                           | Sigma-Aldrich       | <a href="https://www.sigmaaldrich.com/US/en/product/mm/01185">https://www.sigmaaldrich.com/US/en/product/mm/01185</a>                                                                                                                                                                               |
| RNeasy Kits                                      | Qiagen              | <a href="https://www.qiagen.com/us/product-categories/discovery-and-translational-research/dna-rna-purification/rna-purification/total-rna/">https://www.qiagen.com/us/product-categories/discovery-and-translational-research/dna-rna-purification/rna-purification/total-rna/</a>                 |
| High Capacity cDNA Reverse Transcription Kit     | Applied Biosystems  | <a href="https://www.fishersci.com/shop/products/applied-biosystems-high-capacity-cdna-reverse-transcription-kit-4/4368814">https://www.fishersci.com/shop/products/applied-biosystems-high-capacity-cdna-reverse-transcription-kit-4/4368814</a>                                                   |
| TaqMan Gene Expression Master Mix                | Applied Biosystems  | <a href="https://www.fishersci.com/shop/products/applied-biosystems-taqman-gene-expression-master-mix-6/p-4919401">https://www.fishersci.com/shop/products/applied-biosystems-taqman-gene-expression-master-mix-6/p-4919401</a>                                                                     |
| Sample diluent                                   | R&D Systems         | <a href="https://www.rndsystems.com/products/sample-diluent-concentrate-1-5x_dyc001">https://www.rndsystems.com/products/sample-diluent-concentrate-1-5x_dyc001</a>                                                                                                                                 |
| Human eNOS DuoSet ELISA                          | R&D Systems         | <a href="https://www.rndsystems.com/products/human-enos-duoset-elisa_dy950-05">https://www.rndsystems.com/products/human-enos-duoset-elisa_dy950-05</a>                                                                                                                                             |

|                                                    |                          |                                                                                                                                                                                                                                                                                                                               |
|----------------------------------------------------|--------------------------|-------------------------------------------------------------------------------------------------------------------------------------------------------------------------------------------------------------------------------------------------------------------------------------------------------------------------------|
| DuoSet ELISA Ancillary Reagent Kit 2               | R&D Systems              | <a href="https://www.rndsystems.com/products/duoset-elisa-ancillary-reagent-kit-2_dy008b">https://www.rndsystems.com/products/duoset-elisa-ancillary-reagent-kit-2_dy008b</a>                                                                                                                                                 |
| Amplex™ Red Hydrogen Peroxide/Peroxidase Assay Kit | Thermo Fisher Scientific | <a href="https://www.thermofisher.com/order/catalog/product/A22188">https://www.thermofisher.com/order/catalog/product/A22188</a>                                                                                                                                                                                             |
| ECIS ZTheta                                        | Applied Biosystems       | <a href="https://www.biophysics.com/ztheta.php">https://www.biophysics.com/ztheta.php</a>                                                                                                                                                                                                                                     |
| 96 well Array                                      | Applied Biosystems       | <a href="https://applied-biophysics-inc.myshopify.com/products/96w20idf-pet">https://applied-biophysics-inc.myshopify.com/products/96w20idf-pet</a>                                                                                                                                                                           |
| EGM-MV Endothelial Cell Growth Medium Bullet Kit   | Lonza                    | <a href="https://bioscience.lonza.com/lonza_bs/US/en/Primary-and-Stem-Cells/p/000000000000185285/EGM™-MV-Microvascular-Endothelial-Cell-Growth-Medium-BulletKit™">https://bioscience.lonza.com/lonza_bs/US/en/Primary-and-Stem-Cells/p/000000000000185285/EGM™-MV-Microvascular-Endothelial-Cell-Growth-Medium-BulletKit™</a> |
| RAGE inhibitor FPS-ZM1                             | Millipore Sigma          | <a href="https://www.emdmillipore.com/US/en/product/RAGE-Antagonist-FPS-ZM1-Calbiochem,EMD_BIO-553030">https://www.emdmillipore.com/US/en/product/RAGE-Antagonist-FPS-ZM1-Calbiochem,EMD_BIO-553030</a>                                                                                                                       |
| TLR4 inhibitor TAK-242                             | Cayman Chemical          | <a href="https://www.caymanchem.com/product/13871/tak-242">https://www.caymanchem.com/product/13871/tak-242</a>                                                                                                                                                                                                               |
| Recombinant Human S100A8/S100A9                    | R&D Systems              | <a href="https://www.rndsystems.com/products/recombinant-human-s100a8-s100a9-heterodimer-protein-cf_8226-s8">https://www.rndsystems.com/products/recombinant-human-s100a8-s100a9-heterodimer-protein-cf_8226-s8</a>                                                                                                           |
| Human Magnetic Luminex Assay                       | R&D Systems              | <a href="https://www.rndsystems.com/products/human-luminex-discovery-assay_lxsahm">https://www.rndsystems.com/products/human-luminex-discovery-assay_lxsahm</a>                                                                                                                                                               |
| Gram Universal Vaping Machine                      | Gram research            | <a href="https://www.gramresearch.com">https://www.gramresearch.com</a>                                                                                                                                                                                                                                                       |
